# Supplementary material for: Preservation of heparin-binding EGF-like growth factor activity on heparin-modified poly(N-isopropylacrylamide)-grafted surfaces
Source: Royal Society of Chemistry journal article supplement (doi:10.1039/d1ra07317f), 2021-01-01
Supplement: d1ra07317f1.pdf [file d1ra07317f1.pdf]

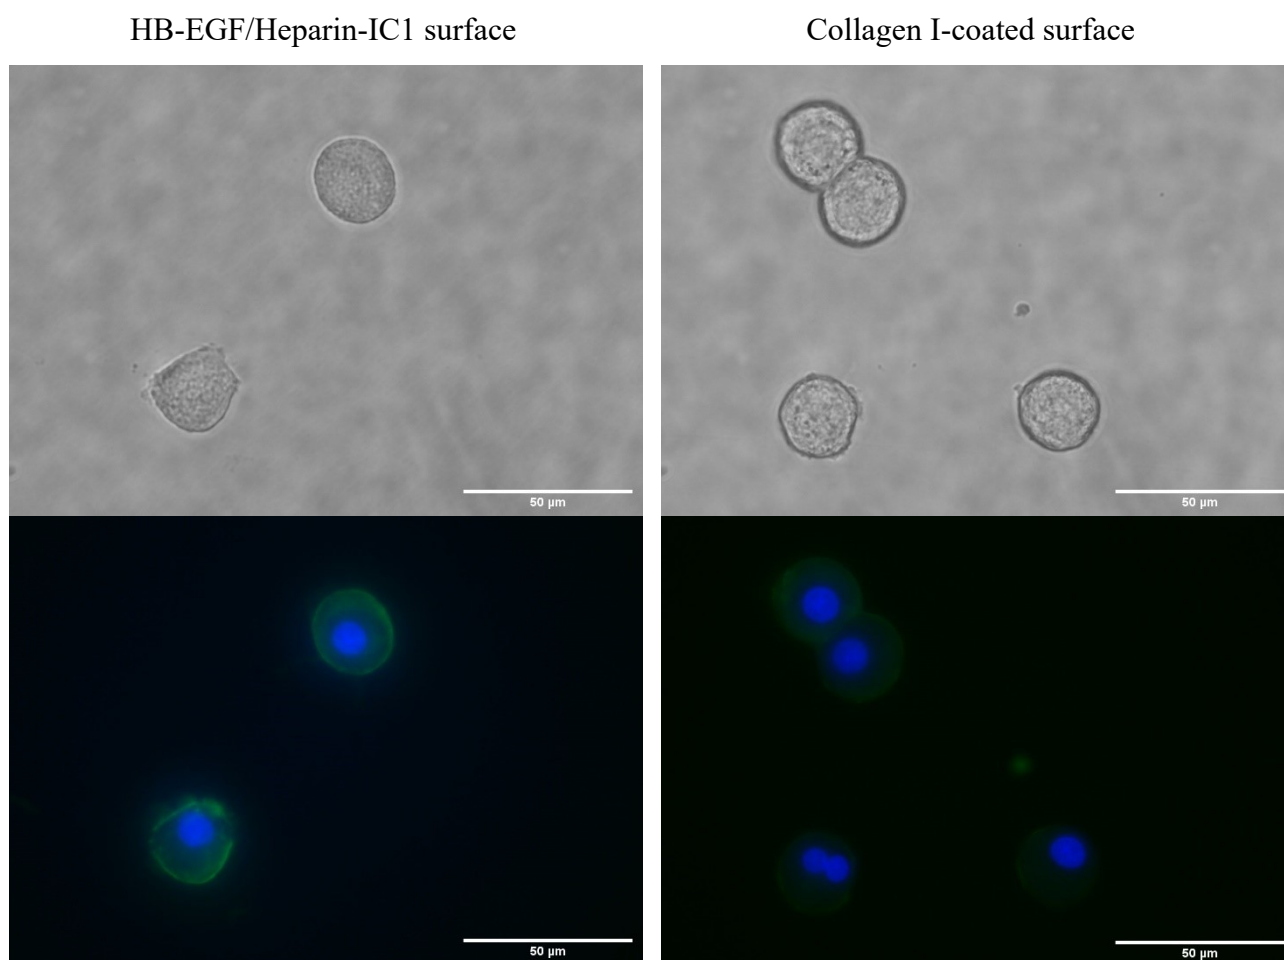

**Figure S1.** Microscopic phase and florescent images of hepatocytes on HB-EGF/Heparin-IC1 surface (left) and Corning® BioCoat™ Collage I dish (right) after 1.5 h incubation in serum-free DMEM containing 2 mg/mL BSA. Seeding density,  $5 \times 10^4$  cells/cm<sup>2</sup>. The incubated hepatocytes were gently rinsed with warmed PBS, fixed with 4% paraformaldehyde fixative for 15 min, and washed twice with PBS. The fixed hepatocytes were treated with 0.5 U/mL Alexa Fluor™ 488 Phalloidin for 20 min and with 2 μg/mL Hoechst 33258 in PBS for 15 min for staining actin (green) and nuclei (blue), respectively. Microscopic images were obtained using microscope color camera DS-Fi3 (Nikon) with imaging software NIS-Elements Br ver. 5.11.01 (Nikon) under an inverted microscope Eclipse Ts2-FL (Nikon) with a 60 × objective lens.
